# Supplementary material
Source: PubMed Central journal article supplement (PMC2843210)

**Fig. S5**

**A**

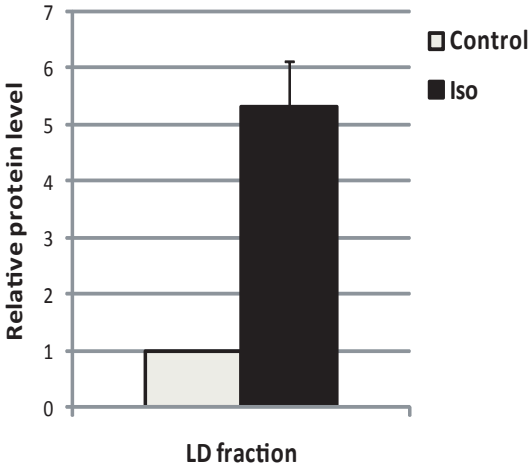

**B**

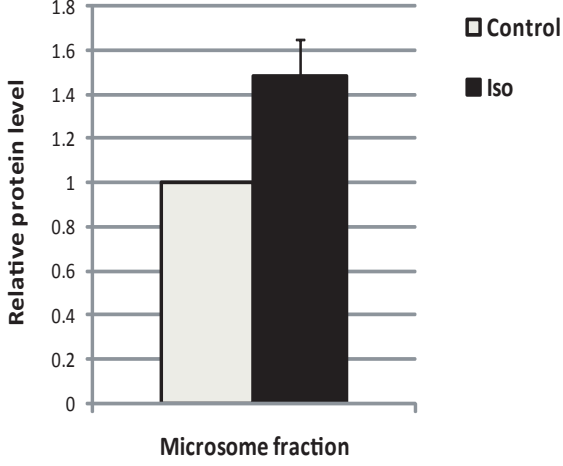

Supplement: supp_M109.043786_jbc.M109.043786-6.pdf [file supp_M109.043786_jbc.M109.043786-6.pdf]
